# Supplementary material
Source: MDPI journal article supplement (https://www.mdpi.com/2072-4292/13/18/3614)
Supplement: s1 [file s1]

*Supplementary Material*

**Of “Rapid Glacier Shrinkage and Glacial Lake Expansion of a  
China-Nepal Transboundary Catchment in the Central Himalaya,  
between 1964 and 2020”**

**Contents of this file**

Table S1

Figures S1 to S3

**Table S1.** Data used for this study.

| Year | Data source  | ID                    | Date<br>yyyy-mm-dd | Resolution<br>(m) | Purpose                 |
|------|--------------|-----------------------|--------------------|-------------------|-------------------------|
| 1964 | KH-4A        | DS1014-2118DA190      | 1964-11-26         | ~2.7              | Lake area, Glacier area |
| 1964 | KH-4A        | DS1014-2118DA191      | 1964-11-26         | ~2.7              | Lake area, Glacier area |
| 1964 | KH-4A        | DS1014-2118DA192      | 1964-11-26         | ~2.7              | Lake area, Glacier area |
| 1964 | KH-4A        | DS1014-2118DA193      | 1964-11-26         | ~2.7              | Lake area, Glacier area |
| 1972 | KH-4A        | DS1116-1023DA068      | 1972-04-21         | ~2.7              | Lake area, Glacier area |
| 1980 | KH-9         | DZB1216-500449L002001 | 1980-10-01         | 6-9               | Lake area, Glacier area |
| 1987 | Landsat TM   | LT051404119871206     | 1987-12-06         | 30                | Lake area               |
| 1988 | Landsat TM   | LT0514004019880903    | 1988-09-03         | 30                | Lake area               |
| 1989 | Landsat TM   | LT0514004119891109    | 1989-11-09         | 30                | Lake area               |
| 1991 | Landsat TM   | LT0514004119911115    | 1991-11-15         | 30                | Lake area               |
| 1992 | Landsat TM   | LT0514004119921101    | 1992-11-01         | 30                | Lake area               |
| 1993 | Landsat TM   | LT0514004119931003    | 1993-10-03         | 30                | Lake area               |
| 1994 | Landsat TM   | LT0514004119941022    | 1994-10-22         | 30                | Lake area               |
| 1995 | Landsat TM   | LT0514004119951025    | 1995-10-25         | 30                | Lake area               |
| 1996 | Landsat TM   | LT0514004119961011    | 1996-10-11         | 30                | Lake area               |
| 1997 | Landsat TM   | LT0514004119971014    | 1997-10-14         | 30                | Lake area               |
| 1998 | Landsat TM   | LT0514004119980915    | 1998-09-15         | 30                | Lake area               |
| 1999 | Landsat TM   | LT0514004119991121    | 1999-11-21         | 30                | Lake area               |
| 2000 | Landsat TM   | LT0514004120001006    | 2000-10-06         | 30                | Lake area, Glacier area |
| 2001 | Landsat TM   | LT0514004120011009    | 2001-10-09         | 30                | Lake area               |
| 2002 | Landsat ETM+ | LE0714004120021004    | 2002-10-04         | 30                | Lake area               |
| 2003 | Landsat TM   | LT0514004120031218    | 2003-12-18         | 30                | Lake area               |
| 2004 | Landsat TM   | LT0514004120041017    | 2004-10-17         | 30                | Lake area               |
| 2005 | Landsat TM   | LT0514004120051105    | 2005-11-05         | 30                | Lake area               |
| 2006 | Landsat TM   | LT0514004120060905    | 2006-09-05         | 30                | Lake area               |
| 2007 | Landsat TM   | LT0514004120070807    | 2007-08-07         | 30                | Lake area               |
| 2008 | Landsat TM   | LT0514004120081012    | 2008-10-12         | 30                | Lake area               |
| 2009 | Landsat TM   | LT0514004120090913    | 2009-09-13         | 30                | Lake area               |
| 2010 | Landsat ETM+ | LE0714004120101026    | 2010-10-26         | 30                | Lake area, Glacier area |
| 2010 | Landsat ETM+ | LE0714004120101111    | 2010-11-11         | 30                | Lake area               |
| 2011 | Landsat ETM+ | LE0714004120111114    | 2011-11-14         | 30                | Lake area               |
| 2011 | Landsat ETM+ | LE0714004120111130    | 2011-11-30         | 30                | Lake area               |
| 2012 | Landsat ETM+ | LE0714004120121031    | 2012-10-31         | 30                | Lake area               |
| 2012 | Landsat ETM+ | LE0714004120121116    | 2012-11-16         | 30                | Lake area               |
| 2013 | Landsat OLI  | LC0814004120131111    | 2013-11-11         | 30                | Lake area               |
| 2014 | Landsat OLI  | LC0814004120140927    | 2014-09-27         | 30                | Lake area               |
| 2015 | Landsat OLI  | LC0814004120150930    | 2015-09-30         | 30                | Lake area               |
| 2016 | Landsat OLI  | LC0814004120161018    | 2016-10-18         | 30                | Lake area               |
| 2017 | Landsat OLI  | LC0814004120171106    | 2017-11-06         | 30                | Lake area               |

|           |                       |                                          |            |                  |                           |
|-----------|-----------------------|------------------------------------------|------------|------------------|---------------------------|
| 2018      | Landsat OLI           | LC0814004120181024                       | 2018-10-24 | 30               | Lake area, Glacier area   |
| 2019      | Landsat OLI           | LC0814004120191011                       | 2019-10-11 | 30               | Lake area                 |
| 2020      | Landsat OLI           | LC0814004120201013                       | 2020-10-13 | 30               | Lake area, Glacier area   |
| 2020      | Planet Scope          | -                                        | 2020-09-29 | 3.125            | Warp KH images            |
| 2020      | Planet Scope          | -                                        | 2020-10-05 | 3.125            | Warp KH images            |
| 2020      | Planet Scope          | -                                        | 2020-10-09 | 3.125            | Warp KH images            |
| 2020      | Planet Scope          | -                                        | 2020-10-11 | 3.125            | Warp KH images            |
| 1990      | (Wang et al., 2020)   | -                                        | -          | -                | Lake area                 |
| 2018      | (Wang et al., 2020)   | -                                        | -          | -                | Lake area                 |
| 1999-2003 | (Dehecq et al., 2019) | PKH_WRS2_B8_1999_2003_snr5_n1_r170_res12 | -          | 120              | Glacier surface velocity  |
| 2013-2015 | (Dehecq et al., 2019) | PKH_WRS2_B8_2013_2015_snr5_n1_r170_res12 | -          | 120              | Glacier surface velocity  |
| 1975-2000 | (Maurer et al., 2019) | -                                        | -          | 30               | Glacier surface elevation |
| 2000-2016 | (Maurer et al., 2019) | -                                        | -          | 30               | Glacier surface elevation |
| 2000      | SRTM DEM              | N27E086                                  | -          | 30               | Glacier surface elevation |
| 2000      | SRTM DEM              | N28E086                                  | -          | 30               | Glacier surface elevation |
| 2007      | ALOS PALSAR           | AP_07609_FBD_F0540_RT1                   | -          | 12.5             | Glacier surface elevation |
| 2007      | ALOS PALSAR           | AP_07609_FBD_F0550_RT1                   | -          | 12.5             | Glacier surface elevation |
| 2007      | ALOS PALSAR           | AP_07857_FBD_F0540_RT1                   | -          | 12.5             | Glacier surface elevation |
| 1979-2019 | ERA5                  | -                                        | -          | 0.25 arc degrees | Meteorological            |
| 2000      | LandScan 2000         | -                                        | -          | 1 km             | Population distribution   |
| 2018      | LandScan 2018         | -                                        | -          | 1 km             | Population distribution   |

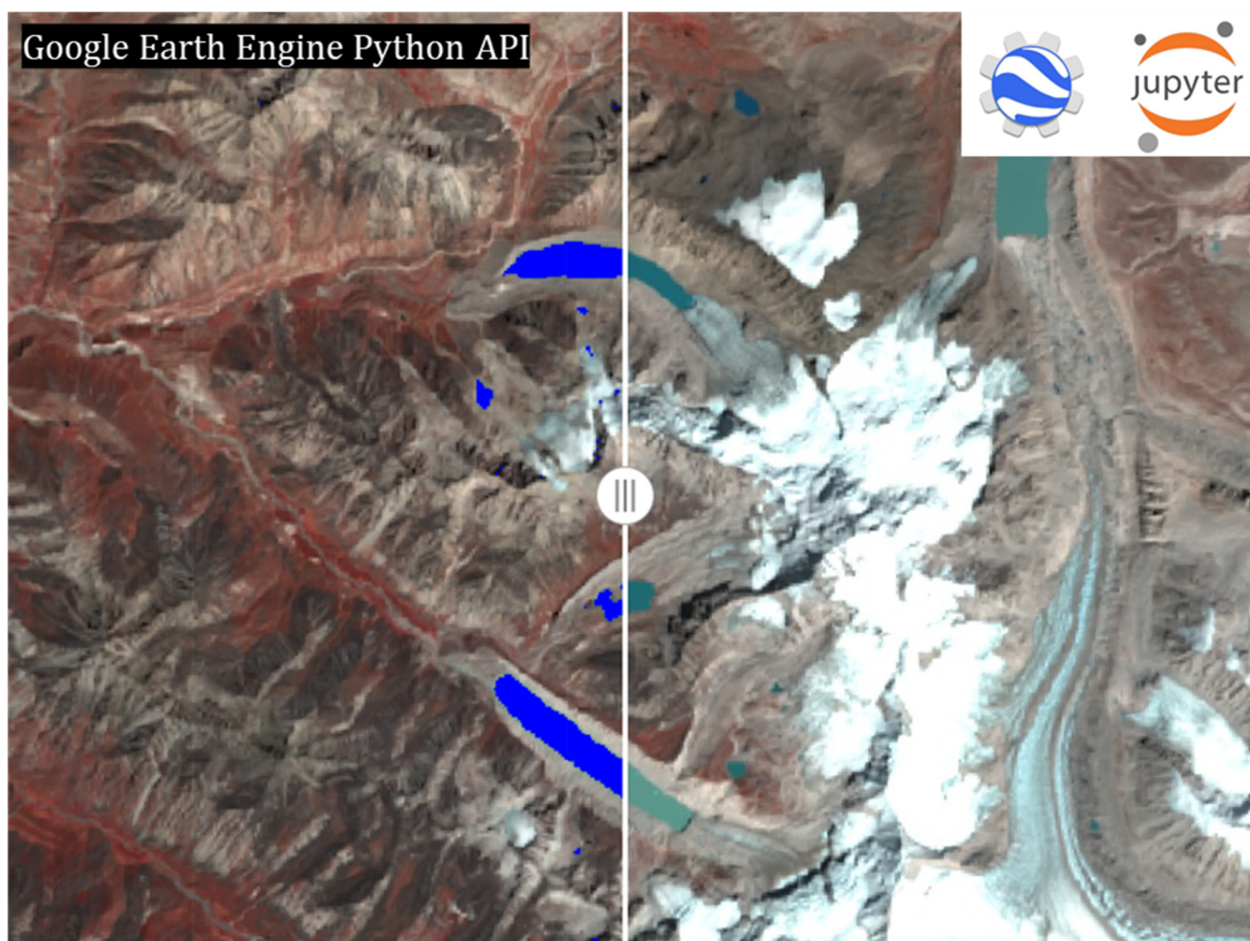

**Figure S1.** An example of extracting the rapid expansion glacial lakes on Landsat images using Google Earth Engine Python API.

**20180706**

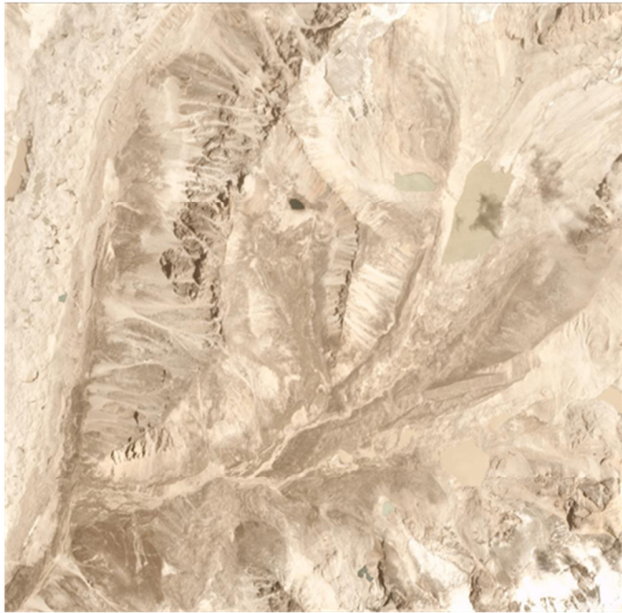

**20180728**

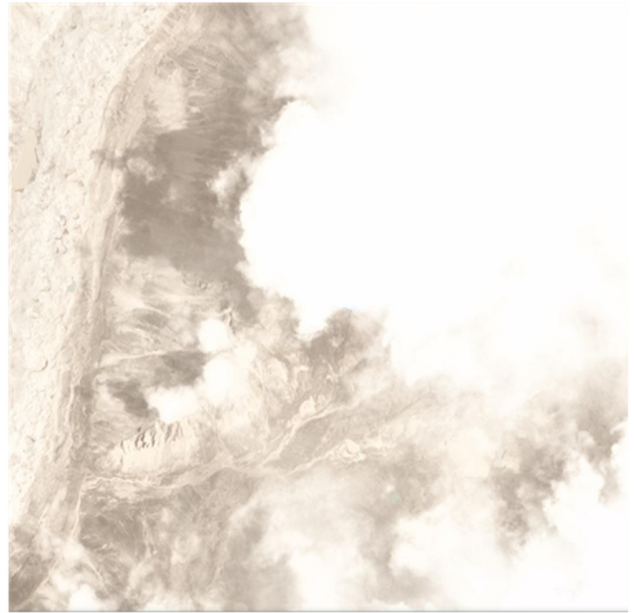

**20180810**

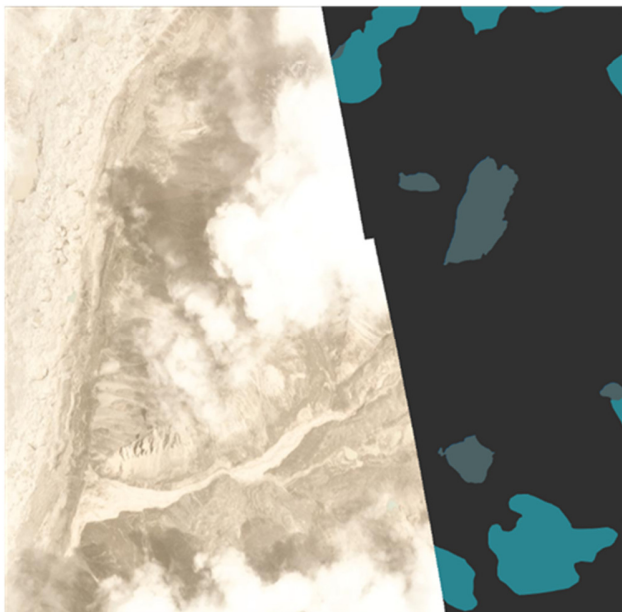

**20180918**

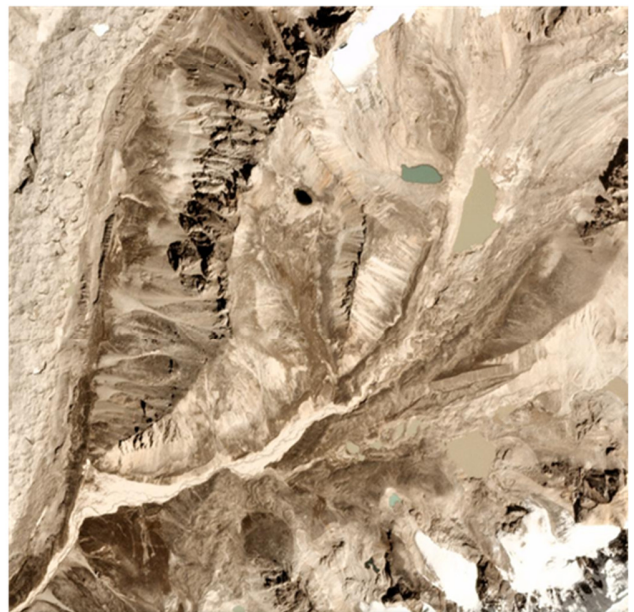

**Figure S2.** Identified Lake A GLOF event by PlanetScope imagery.



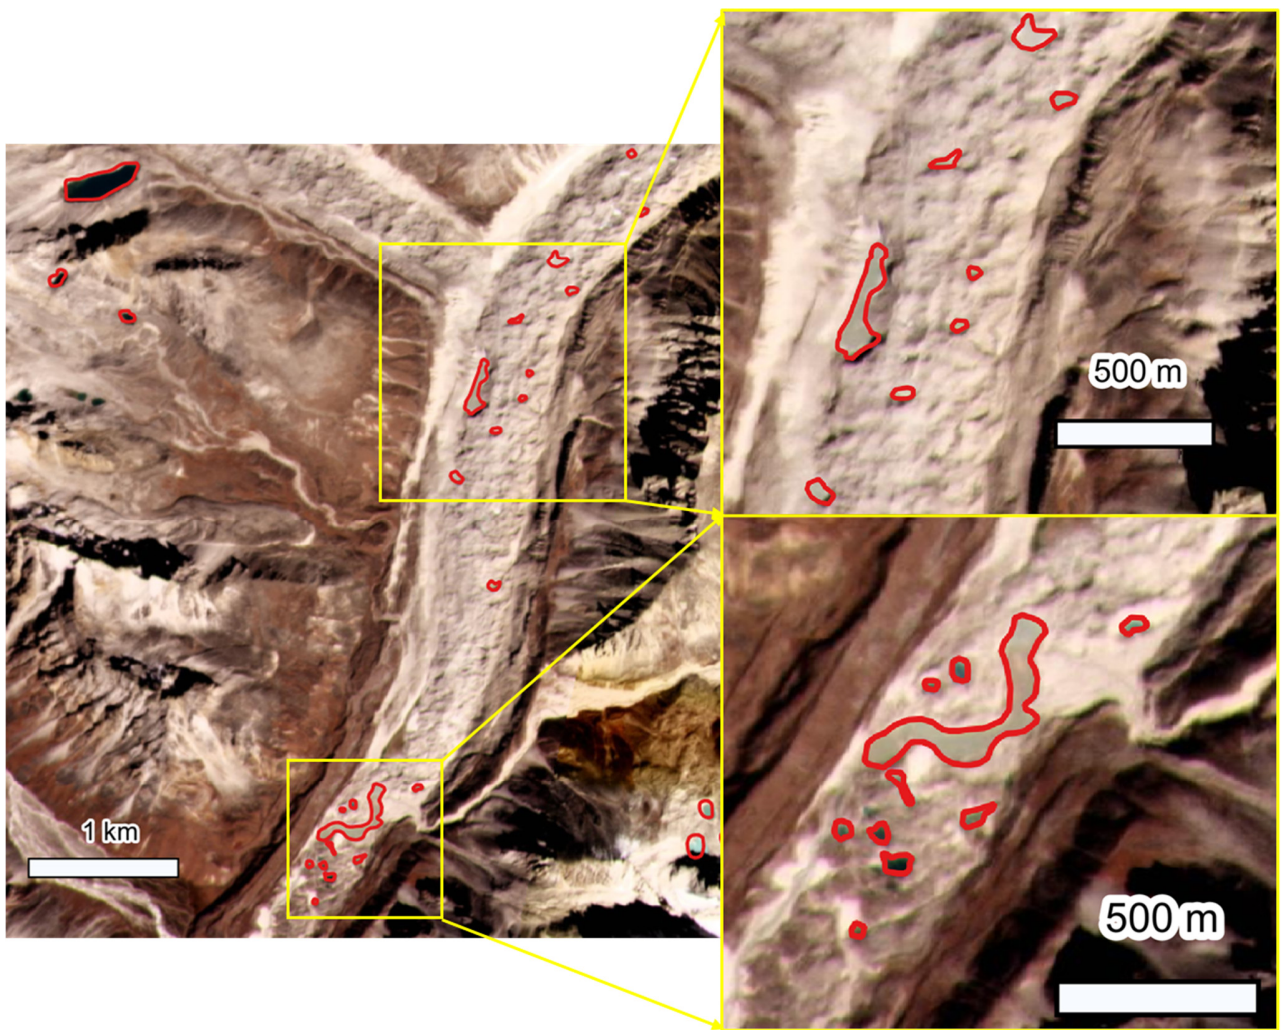

Figure S3. Supraglacial lakes and ice cliffs on Glacier M base on PlanetScope image.
